# Supplementary material for: PD-L1 expression predicts the efficacy of PD-1 blockade plus chemotherapy versus chemotherapy alone in treatment-naïve advanced or metastatic gastric cancer: a pooled analysis of reconstructed individual patient-level data from two randomized trials
Source: Frontiers journal article supplement (doi:10.3389/fcell.2025.1636288), 2025-07-03
Supplement: Data_Sheet_1.pdf [file Data_Sheet_1.pdf]

## Supplementary Materials

### Contents:

|                                                                                                                                                      |   |
|------------------------------------------------------------------------------------------------------------------------------------------------------|---|
| Figure S1. Literature selection process. ....                                                                                                        | 2 |
| Figure S2. Quality assessment of data reconstruction and matching for the<br>chemo-immunotherapy arm in CheckMate 649. ....                          | 3 |
| Figure S3. Quality assessment of data reconstruction and matching for the chemotherapy-only<br>arm in CheckMate 649. ....                            | 4 |
| Figure S4. Quality assessment of data reconstruction and matching for the<br>chemo-immunotherapy arm in ORIENT-16. ....                              | 5 |
| Figure S5. Quality assessment of data reconstruction and matching for the chemotherapy-only<br>arm in ORIENT-16. ....                                | 6 |
| Table S1 The original reported data and reconstructed data of overall survival and<br>progression-free survival in CheckMate 649 and ORIENT-16. .... | 7 |

**Figure S1. Literature selection process.**

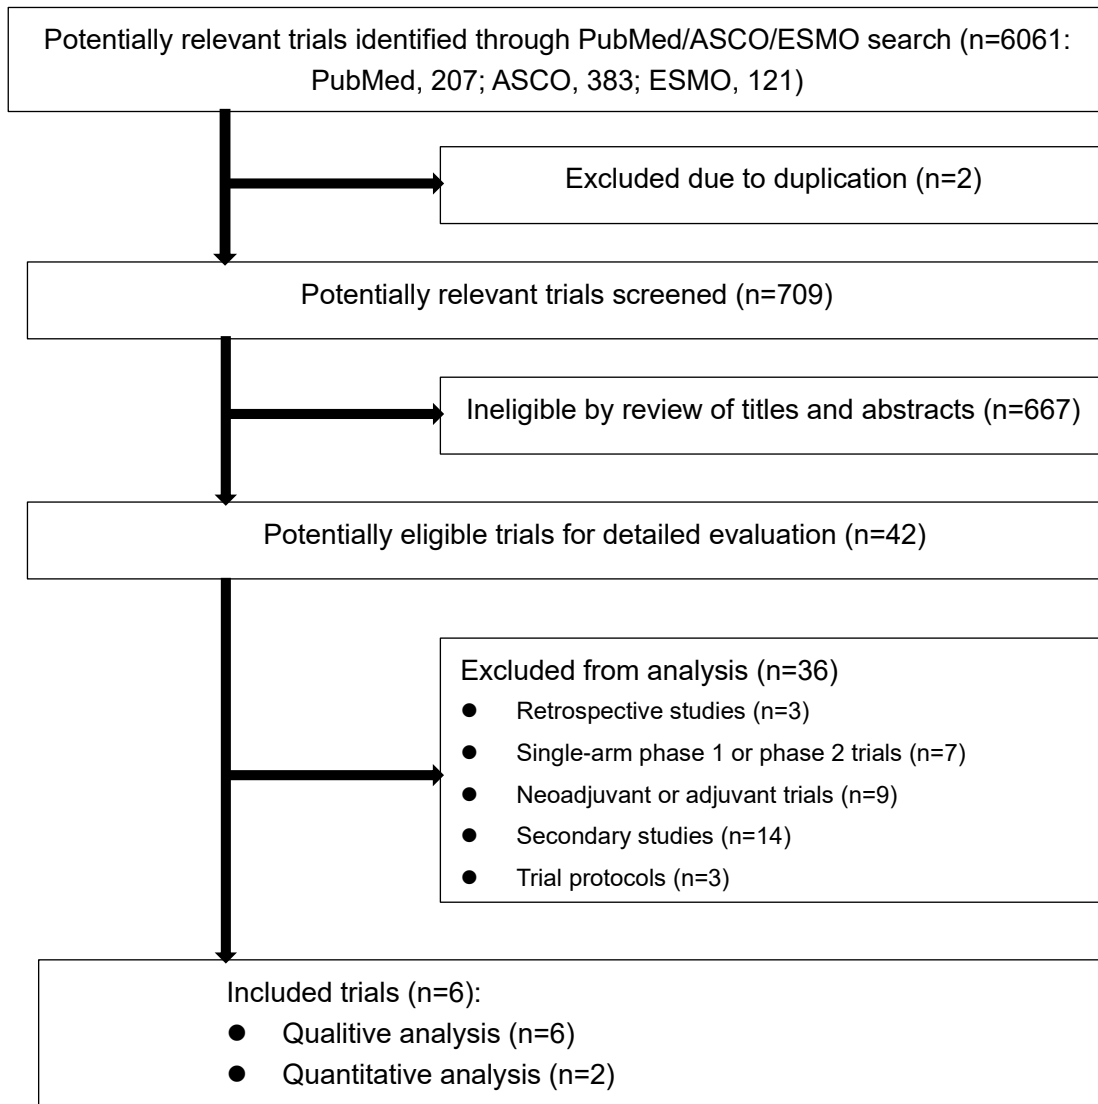

**Figure S2. Quality assessment of data reconstruction and matching for the chemo-immunotherapy arm in CheckMate 649.**

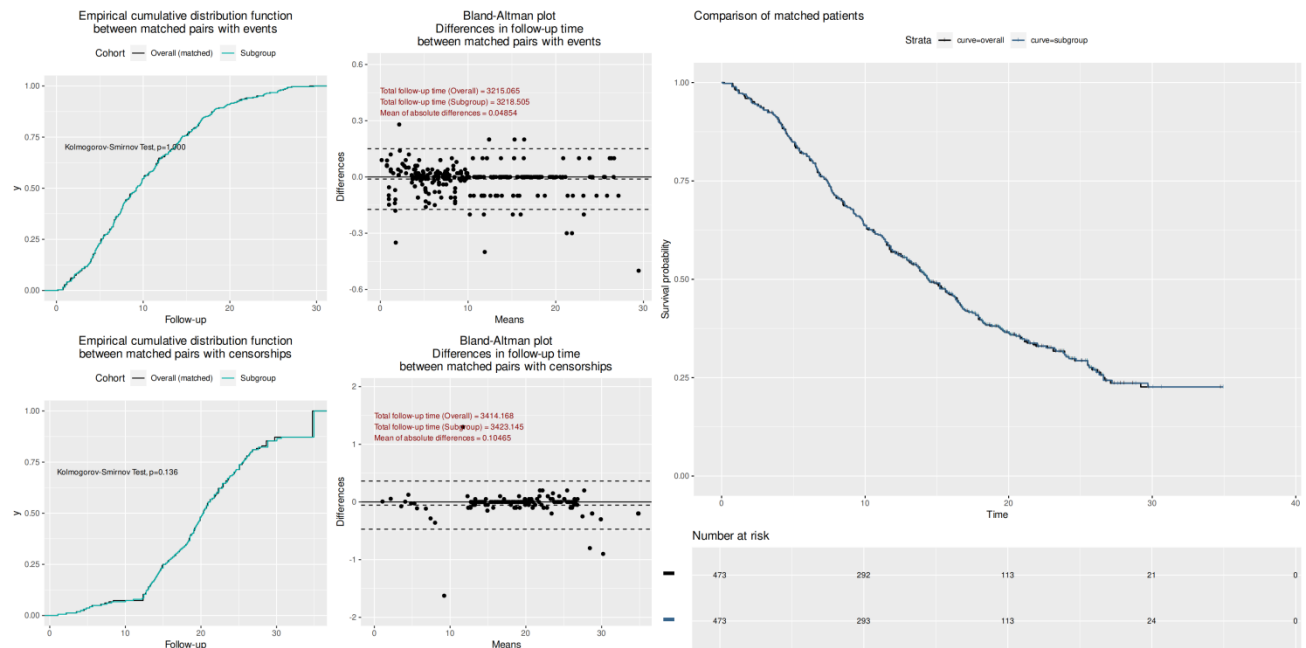

**Figure S3. Quality assessment of data reconstruction and matching for the chemotherapy-only arm in CheckMate 649.**

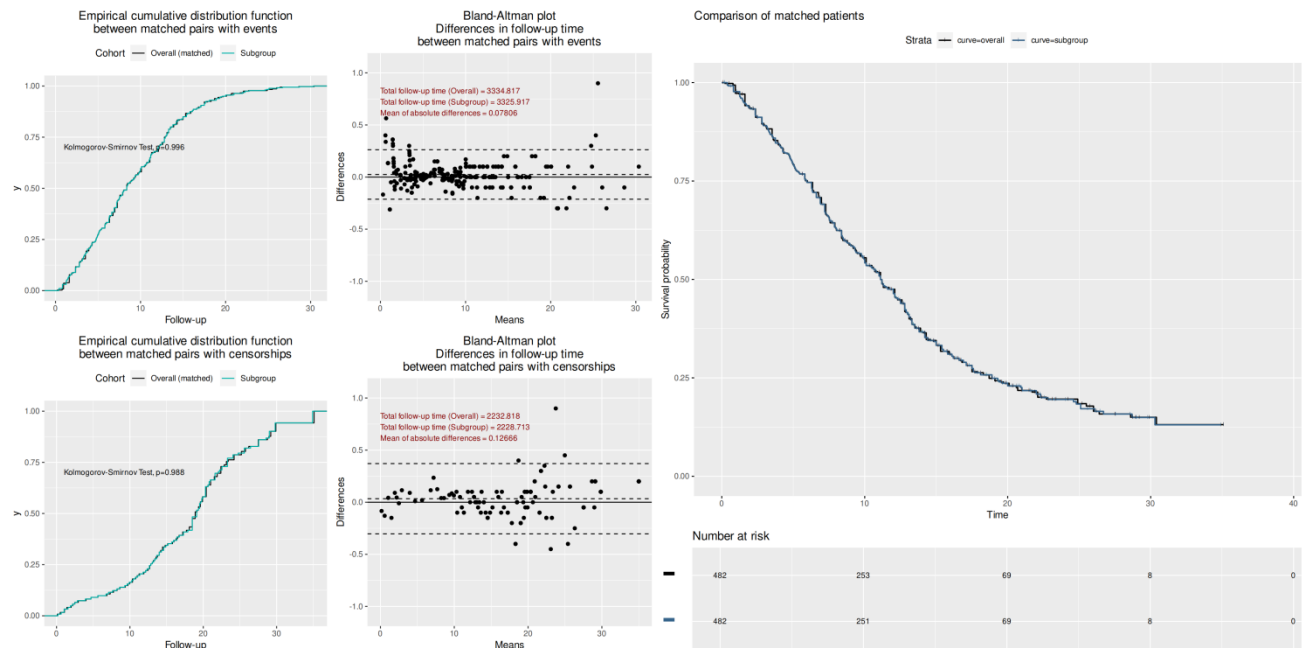

**Figure S4. Quality assessment of data reconstruction and matching for the chemo-immunotherapy arm in ORIENT-16.**

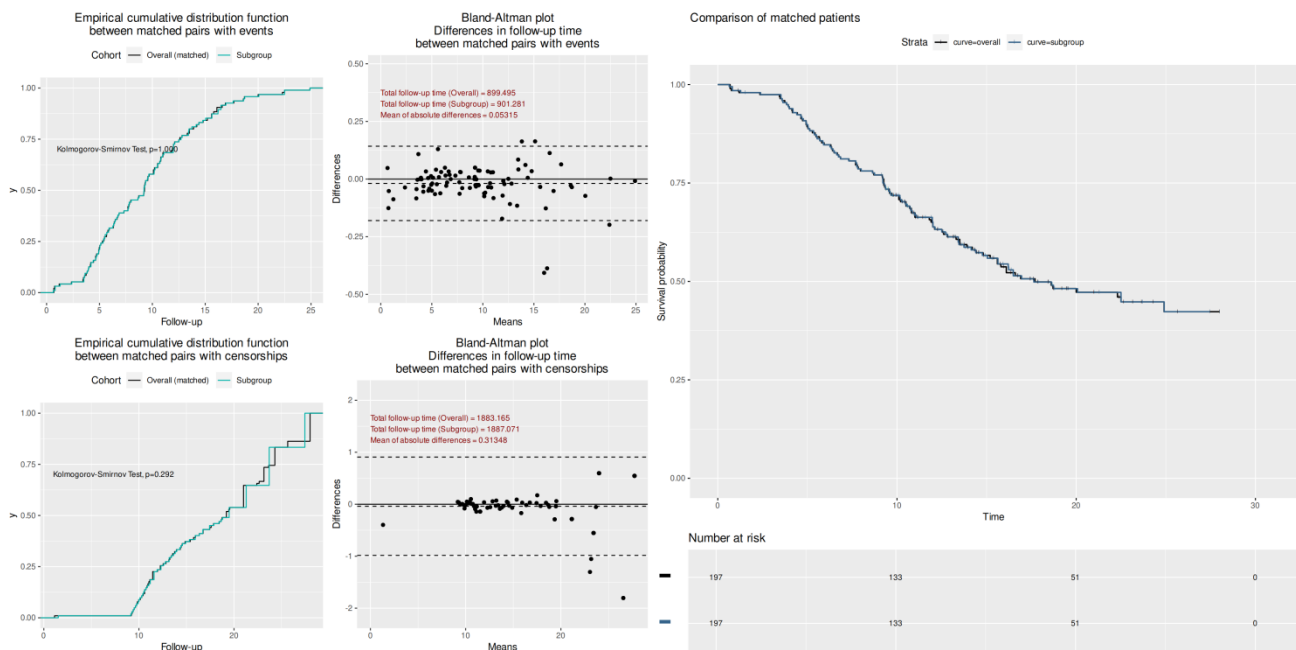

**Figure S5. Quality assessment of data reconstruction and matching for the chemotherapy-only arm in ORIENT-16.**

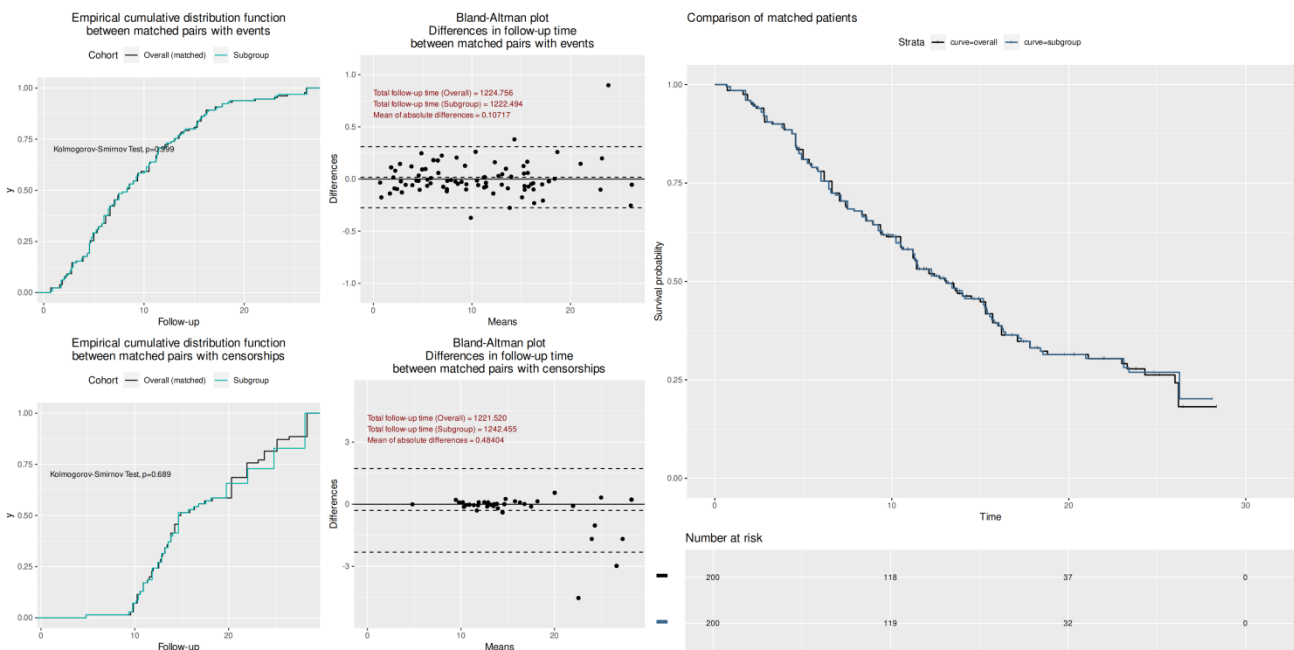

**Table S1 The original reported data and reconstructed data of overall survival and progression-free survival in CheckMate 649 and ORIENT-16.**

|                             | OS       |               | PFS      |               |
|-----------------------------|----------|---------------|----------|---------------|
|                             | Reported | Reconstructed | Reported | Reconstructed |
| <b>HR</b>                   |          |               |          |               |
| CheckMate 649, ITT          | 0.80     | 0.80          | 0.77     | 0.78          |
| CheckMate 649, CPS $\geq$ 5 | 0.71     | 0.71          | 0.68     | 0.70          |
| ORIENT-16, ITT              | 0.77     | 0.74          | 0.64     | 0.67          |
| ORIENT-16, CPS $\geq$ 5     | 0.66     | 0.63          | 0.63     | 0.63          |
| <b>Median, months</b>       |          |               |          |               |
| <b>(Treatment arm)</b>      |          |               |          |               |
| CheckMate 649, ITT          | 13.8     | 14.0          | 7.7      | 7.7           |
| CheckMate 649, CPS $\geq$ 5 | 14.4     | 14.4          | 7.7      | 7.7           |
| ORIENT-16, ITT              | 15.2     | 15.6          | 7.1      | 7.3           |
| ORIENT-16, CPS $\geq$ 5     | 18.4     | 17.6          | 7.7      | 7.3           |
| <b>Median, months</b>       |          |               |          |               |
| <b>(Control arm)</b>        |          |               |          |               |
| CheckMate 649, ITT          | 11.6     | 11.7          | 6.9      | 6.9           |
| CheckMate 649, CPS $\geq$ 5 | 11.1     | 11.1          | 6.0      | 6.1           |
| ORIENT-16, ITT              | 12.3     | 12.6          | 5.7      | 6.0           |
| ORIENT-16, CPS $\geq$ 5     | 12.9     | 13.1          | 5.8      | 5.8           |

**Abbreviations:** CPS: Combined Positive Score; OS: overall survival; PFS: progression-free survival; ITT: Intention-to-treat population.
